# Supplementary material
Source: Springer Nature journal article supplement (https://www.springermedizin.de/resource/supplementary/12888_2013_1481_MOESM2_ESM.pdf/9480506)

**DASS Depression**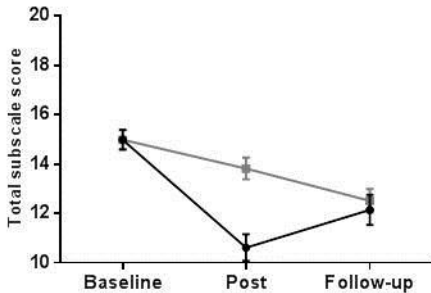**DASS Stress**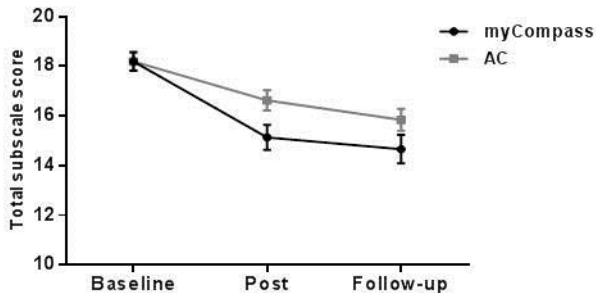**DASS Anxiety**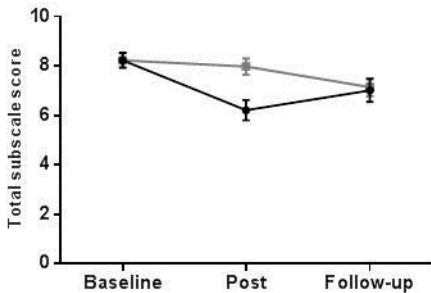**DASS Total**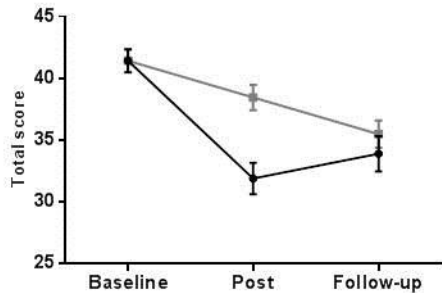

Supplement: MOESM2 [file 9480506]
